# Supplementary material for: Comparative Analysis of Composition and Porosity of the Biogenic Powder Obtained from Wasted Crustacean Exoskeletonsafter Carotenoids Extraction for the Blue Bioeconomy
Source: MDPI journal article supplement (doi:10.3390/w15142591), 2023-07-16
Supplement: s1 [file s1]

## Supplementary Information

# Comparative Analysis of Composition and Porosity of the Biogenic Powder Obtained from Wasted Crustacean Exoskeletons after Carotenoids Extraction for the Blue Bioeconomy

Fran Nekvapil <sup>1,2,3</sup>, Maria Mihet <sup>2</sup>, Geza Lazar <sup>1,3</sup>, Simona Cîntă Pinzaru <sup>1,3</sup>, Ana Gavrilović <sup>4</sup>, Alexandra Ciorîță <sup>2,5</sup>, Erika Levei <sup>6</sup>, Tudor Tamaș <sup>7</sup> and Maria-Loredana Soran <sup>2,\*</sup>

<sup>1</sup> Ioan Ursu Institute, Babeș-Bolyai University, 1 Kogălniceanu, 400084 Cluj-Napoca, Romania; fran.nekvapil@ubbcluj.ro (F.N.); geza.lazar@ubbcluj.ro (G.L.); simona.pinzaru@ubbcluj.ro (S.C.P.)

<sup>2</sup> National Institute for Research and Development of Isotopic and Molecular Technologies, 67-103 Donat, 400293 Cluj-Napoca, Romania; maria.mihet@itim-cj.ro (M.M.); alexandra.ciorita@itim-cj.ro (A.C.)

<sup>3</sup> RDI Institute of Applied Natural Sciences, Babeș-Bolyai University, Fântânele 30, 400327 Cluj-Napoca, Romania

<sup>4</sup> University of Zagreb, Faculty of Agriculture, Svetošimunska 25, 10000 Zagreb, Croatia; ana.gavrilovic@unipu.hr

<sup>5</sup> Electron Microscopy Center, Babeș-Bolyai University, 5-7 Clinicilor, 400006 Cluj-Napoca, Romania;

<sup>6</sup> INCDO-INOE 2000, Research Institute for Analytical Instrumentation, 67 Donat, 400296 Cluj-Napoca, Romania; erika.levei@icia.ro

<sup>7</sup> Department of Geology, Babeș-Bolyai University, 1 Kogălniceanu, 400084 Cluj-Napoca, Romania; tudor.tamas@ubbcluj.ro

\* Correspondence: loredana.soran@itim-cj.ro

## Content:

Figure S1

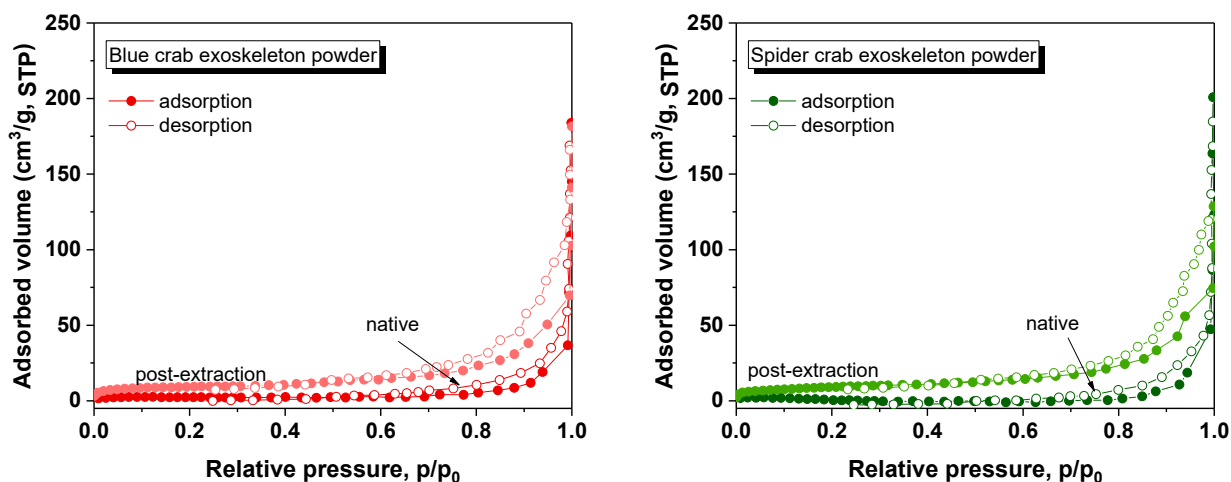

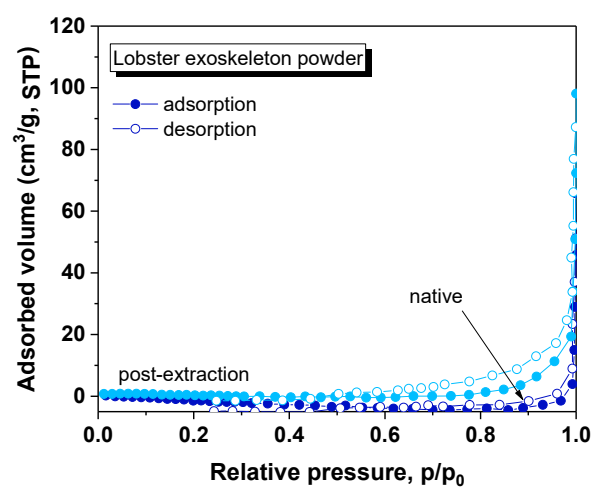

Figure S1. N<sub>2</sub> adsorption-desorption isotherms of the native and post-extraction blue crab (*Callinectes sapidus*), spider crab (*Maja squinado*), and spiny lobster (*Palinurus elephas*) exoskeleton powder.
